# Supplementary material
Source: PubMed Central journal article supplement (PMC2727413)
Supplement: blood-2008-10-184754_1.pdf [file blood-2008-10-184754_1.pdf]

|                  | <i>CXCR4</i> <sup>+/+</sup> Chimeras |                  | <i>CXCR4</i> <sup>-/-</sup> Chimeras |                  |
|------------------|--------------------------------------|------------------|--------------------------------------|------------------|
|                  | Untreated                            | G-CSF            | Untreated                            | Untreated        |
| Bone Marrow      | 516,949 ± 85,816                     | 329,240 ± 51,123 | 539,353 ± 90,387                     | 319,088 ± 52,671 |
| Spleen           | 5,711 ± 2,044                        | 90,957 ± 25,015* | 54,618 ± 11,659                      | 62,043 ± 22,907  |
| Peripheral Blood | 164 ± 36                             | 5,868 ± 2,002*   | 18,045 ± 6,384                       | 17,119 ± 5,479   |

The total number of CFU-C in the bone marrow, spleen, and peripheral blood was calculated assuming that 1 femur represents 6% of the total bone marrow and that the total blood volume in the mouse is 1.8 ml. Data represent the mean ± SEM. \*p<0.01 compared with untreated mice.
